# Supplementary material for: Adjuvant Therapy with Budesonide Post-Kasai Reduces the Need for Liver Transplantation in Biliary Atresia
Source: MDPI journal article supplement (doi:10.3390/jcm10245758), 2021-12-09
Supplement: s1 [file s1]

**Table S1.** Demographic and laboratory features of the study population.

|                                  | Study group (range) | Control group (range) | p-value   |
|----------------------------------|---------------------|-----------------------|-----------|
| <b>Gestational age (weeks)</b>   | 38,5<br>(28 – 42)   | 38,6<br>(25 – 42)     | n. s.     |
| <b>Male/female (%)</b>           | 37%/63%             | 42%/58%               | n. s.     |
| <b>Syndromatic form (%)</b>      | 10%                 | 12%                   | n. s.     |
| <b>Age at KPE (days)</b>         | 60<br>(26 – 142)    | 65<br>(16 – 150)      | n. s.     |
| <b>AST at KPE (IU/l)</b>         | 238<br>(50 – 1307)  | 234<br>(40 – 1059)    | n. s.     |
| <b>ALT at KPE (IU/l)</b>         | 162<br>(25 – 654)   | 157<br>(20 – 662)     | n. s.     |
| <b>GGT at KPE (IU/l)</b>         | 549<br>(66 – 2164)  | 549<br>(66 – 1470)    | n. s.     |
| <b>Bilirubin at KPE (μmol/l)</b> | 136<br>(70 – 244)   | 156<br>(66 – 347)     | p = 0.009 |

**Table S2.** Outcome related to the age in days, when the Kasai procedure was performed.

| Age at KPE (days) | SOA            | SNL            | SNLjf          |
|-------------------|----------------|----------------|----------------|
| < 31              | 83%<br>(10/12) | 25%<br>(3/12)  | 17%<br>(2/12)  |
| 31-60             | 91%<br>(68/75) | 52%<br>(39/75) | 48%<br>(36/75) |
| > 60              | 87%<br>(64/74) | 37%<br>(27/74) | 30%<br>(22/74) |

**Table S3.** Compilation of 14 adjuvant therapy studies after Kasai-portoenterostomy.

| Author                 | Study design and OEBM | Patients/contr ols | Follow up rate % months | Drug Administration                    | Outcome parameters            | Survival with native liver | Incidence LTx | Conclusion and comments                                     |
|------------------------|-----------------------|--------------------|-------------------------|----------------------------------------|-------------------------------|----------------------------|---------------|-------------------------------------------------------------|
| Meyers (2003) [1]      | R IIIb                | 14/14              | 96.3%<br>42 months      | (Methyl)prednisolone i.v. and p.o. (1) | SNL ( 3 -4 m)<br>IncTx (12 m) | improved                   | reduced       | steroids may improve the clearance of jaundice              |
| Kobayashi (2005) [2]   | R IIIb                | 51/12              | n.a.                    | Prednisolone i.v. (2)                  | n.i.                          | n. i.                      | n. i.         | not analysable                                              |
| Escobar (2006) [3]     | R IIIb                | 21/22              | 88.4%<br>n.i.           | Prednisolone i.v. (3)                  | CoJ (6 m) incLTx              | improved                   | not reduced   | significantly improved clearance of jaundice after 6 months |
| Vejchapipat (2007) [4] | R IIIb                | 33/20              | n.i.                    | Prednisolone p.o. (4)<br>oral          | SNL (6 m)                     | not improved               |               | no effect                                                   |
| Davenport (2007) [5]   | P Ib                  | 36/37              | 94.4%<br>12 months      | Prednisolone p.o. (5)<br>oral          | jfSNL (6m and 12)             | not improved               | not reduced   | initially improved clearance of jaundice                    |
| Petersen (2008) [18]   | P IIb                 | 49/20              | 100%<br>24 – 66 months  | (Methyl)prednisolone i.v. p.o. (6)     | SNL (6m and 24 m)             | not improved               | not reduced   | high dose steroids do not reduce LTx incidence              |
| Chung (2008) [6]       | R IIIb                | 13/17              | n.i.                    | Prednisolone p.o. (7)                  | SNL and incLTx ( 3 and 6 m)   | not improved               | not reduced   | initially improved clearance of jaundice                    |
| Davenport (2013) [7]   | P Ib                  | 62/91              | 100%<br>24 months       | Prednisone p.o. (8)                    | jfSNL (6m)<br>SNL (48 m)      | not improved               | not reduced   | iInitially improved clearance of jaundice                   |

|                           |              |        |                                             |                                                     |                                          |              |             |                                                |
|---------------------------|--------------|--------|---------------------------------------------|-----------------------------------------------------|------------------------------------------|--------------|-------------|------------------------------------------------|
| Bezerra (2014) [8]        | P, DR, PC Ib | 70/70  | 90.7%<br>24 months                          | (Methyl)prednisolone<br>i.v. and p.o. (9)           | jfSNL (6 m)<br>SNL (24 m)                | not improved | not reduced | High dose steroids do not reduce LTx incidence |
| Tanaka (2019) [9]         | R IV         | 16/?   | n.i.                                        | (Methyl)prednisolone<br>i.v. and p.o. (10)          | CoJ 3m                                   | n.i.         | n.i.        | not analysable                                 |
| Kumar (2019) [10]         | R IV         | 79/?   | 87.1%<br>24 months                          | Prednisolone p.o. (11)                              | CoJ (6m)                                 | n.i.         | n.i.        | not analysable                                 |
| Parolini (2019) [11]      | R IIIb       | 8/28   | 100%<br>6 months                            | Ganciclovir<br>Valganciclovir<br>i.v. and p.o. (12) | SNL (24 m)                               | n.i.         | n.i.        | no clear message                               |
| Mack (2019) [12]          | P IIb        | 29/64  | 96.7%<br>12 months                          | Immunoglobulines<br>i.v. (13)                       | incLTx (12 m)                            | not improved | not reduced | no improvement of SNL with immunoglobulines    |
| Pietrobattista (2020) [9] | P IIb        | 25/18  | 100%<br>24 months                           | (Methyl)prednisolone<br>i.v. and p.o. (14)          | SNL (24 m)                               | not improved | not reduced | no effect                                      |
| This study                | R IIb        | 107/83 | 100%<br>6, 12, 24,<br>122 and 229<br>months | Budesonide<br>rectally                              | SNL, jfSNL<br>(6m, 24m, 122 m,<br>229 m) | improved     | reduced     | Significantly reduced need for LTx             |

Study design: R - retrospective; P – prospective; RD – randomized; PC – placebo controlled. OEBM: Oxford Centre for Evidence Based Medicine, available at: <http://www.cebm.net>. Accessed December 1, 2020. Administration: i.v. – intravenously; p.o. orally; n.i. no information. Outcome parameters: SNL – survival with native liver (months after Kasai); jfSNL – Jaundice free survival with native liver (months after Kasai); incLTx - incidence LTx; CoJ - Clearance of jaundice (not defined). Dosage and application:

(1) Tapering 10, 8, 6, 5, 4, 3, 2 mg/kg/d (1 week), follow by prednisone p.o. 2 mg/kg/d for 8 – 12 weeks; (2) 4 different protocols (P), each dose was given for 3 days: P1: 6, 4, 2mg, P2: 10, 5, 2mg, P3: 20, 15, 10, 5, 2mg, P4: same as P3 + each time stools turn pale, protocol was restarted at 20mg; (3) Doses varied from 2 mg/kg/d (low) to 20 mg/kg/d (pulses) tapering over 2 – 6 weeks; (4) 4 mg/kg/d for 3 to 4 days, then at alternate days for 1 – 3 months; (5) 2mg/kg/d day 7 to 21 and 1mg/kg/d day 22 to 28; (6) Methylprednisolone i.v. 10mg/kg/d day 1 to 5 followed by Methylprednisolone p.o. 1mg/kg/d day 26 to 28; (7) Prednisolone p.o. 4mg/kg/d week 2 – 3, 2mg/kg/d week 4 – 5, 1mg/kg/d week 6 – 7; (8) Low dose regimen: Prednisolone p.o. 2mg/kg/d day 7 to 2, 1mg/kg/d day 22 to 28, High dose regimen: Prednisolone p.o., 5mg/kg/d day 5 to 9, 4mg/kg/d day 10 to 14, 3mg/kg/d day 15 to 19, 2mg/kg/d day 20 to 24, 1mg/kg/d day 25 to 29, then Hydrocortisone: 2.5mg/kg twice per day from day 30 to 32 and once per day from day 33 to 35; (9) Methylprednisolone i.v. 4mg/kg/d for 2 weeks, followed by prednisolone p.o. 2mg/kg/d for 2 weeks, followed by a 9 week tapering protocol; (10) Prednisolone p.o. 4mg/kg/d for 5 days, 2mg/kg/d for 5 days, 1mg/kg/d for 5 days, 0.5mg/kg/d for 5 days, pulse therapy: methylprednisolone i.v. 20mg/kg/d for 2 days, 10mg/kg/d for 2 days, 5mg/kg/d for 2 days, followed by an oral prednisolone protocol; (11) Prednisolone p.o. 2mg/kg/d for 2 weeks, followed by a 4 week tapering protocol; (12) Ganciclovir i.v. 5mg/kg/d for 1 week, followed by valganciclovir p.o. 520mg/m<sup>2</sup>/d until negativity of CMV DNA titer; (13) immunoglobulines i.v. 1g/kg IVIg at days 3 to 5, 30 and 60 days after KPE; (14) Methylprednisolone i.v. 10mg/kg/d, decreasing 2mg/kg/d every 24h, until the dose of 2mg/kg/d, followed by prednisolone p.o. 2mg/kg/d for 15 days, 1mg/kg/d for 15 days, 0.5mg/kg/d for 15 days, 0.25mg/kg/d for 15 days

## References

- 1 Meyers RL, Book LS, O’Gorman MA, Jackson WD, Black RE, Johnson DG, et al. High-dose steroids, ursodeoxycholic acid, and chronic intravenous antibiotics improve bile flow after Kasai procedure in infants with biliary atresia. *J Pediatr Surg* 2003;38:406-11.
- 2 Kobayashi H, Yamataka A, Koga H, Okazaki T, Tamura T, Urao M, et al. Optimum prednisolone usage in patients with biliary atresia postportoenterostomy. *J Pediatr Surg* 2005;40:327-30.

- 3 Escobar MA, Jay CL, Brooks RM, West KW, Rescorla FJ, Molleston JP, et al. Effect of corticosteroid therapy on outcomes in biliary atresia after Kasai portoenterostomy. *J Pediatr Surg* 2006;41:99-103.
- 4 Vejchapipat P, Passakonnirin R, Sookpotarom P, Chittmittrapap S, Poovorawan Y. High-dose steroids do not improve early outcome in biliary atresia. *J Pediatr Surg* 2007;42:2102-5.
- 5 Davenport M, Stringer MD, Tizzard SA, McClean P, Mieli-Vergani G, Hadzic N. Randomized, double-blind, placebo-controlled trial of corticosteroids after Kasai portoenterostomy for biliary atresia. *Hepatology* 2007;46:1821-7.
- 6 Chung HY, Wong KKY, Cheun Leung Lan LCL, Tam PKH. Evaluation of a standardized protocol in the use of steroids after Kasai operation. *Pediatr Surg Int* 2008;24:1001-4.
- 7 Davenport M, Parsons C, Tizzard S, Hadzic N. Steroids in biliary atresia: single surgeon, single centre, prospective study. *J Hepatol* 2013;59:1054-8.
- 8 Bezerra JA, Spino C, Magee JC, Shneider BL, Rosenthal P, Wang KS. Use of corticosteroids after hepatoportoenterostomy for bile drainage in infants with biliary atresia: the START randomized clinical trial. *JAMA* 2014;311:1750-9.
- 9 Tanaka Y, Shirota C, Tainaka T, Sumida W, Oshima K, Makita S, et al. Efficacy of and prognosis after steroid pulse therapy in patients with poor reduction of jaundice after laparoscopic Kasai portoenterostomy. *Pediatr Surg Int* 2019;35:1059-63.
- 10 Kumar R, Lal BB, Sood V, Khanna R, Kumar S, Bharathy KGS, et al. Predictors of Successful Kasai Portoenterostomy and Survival with Native Liver at 2 Years in Infants with Biliary Atresia. *J Clin Exp Hepatol* 2019;9:453-9.
- 11 Parolini F, Hadzic N, Davenport M. Adjuvant therapy of cytomegalovirus IgM + ve associated biliary atresia: Prima facie evidence of effect. *J Pediatr Surg* 2019;54:1941-5.
- 12 Mack CL, Spino C, Alonso EM, Bezerra JA, Moore J, Goodhue C, et al. A Phase I/IIa Trial of Intravenous Immunoglobulin Following Portoenterostomy in Biliary Atresia. *J Pediatr Gastroenterol Nutr* 2019;68:495-01.

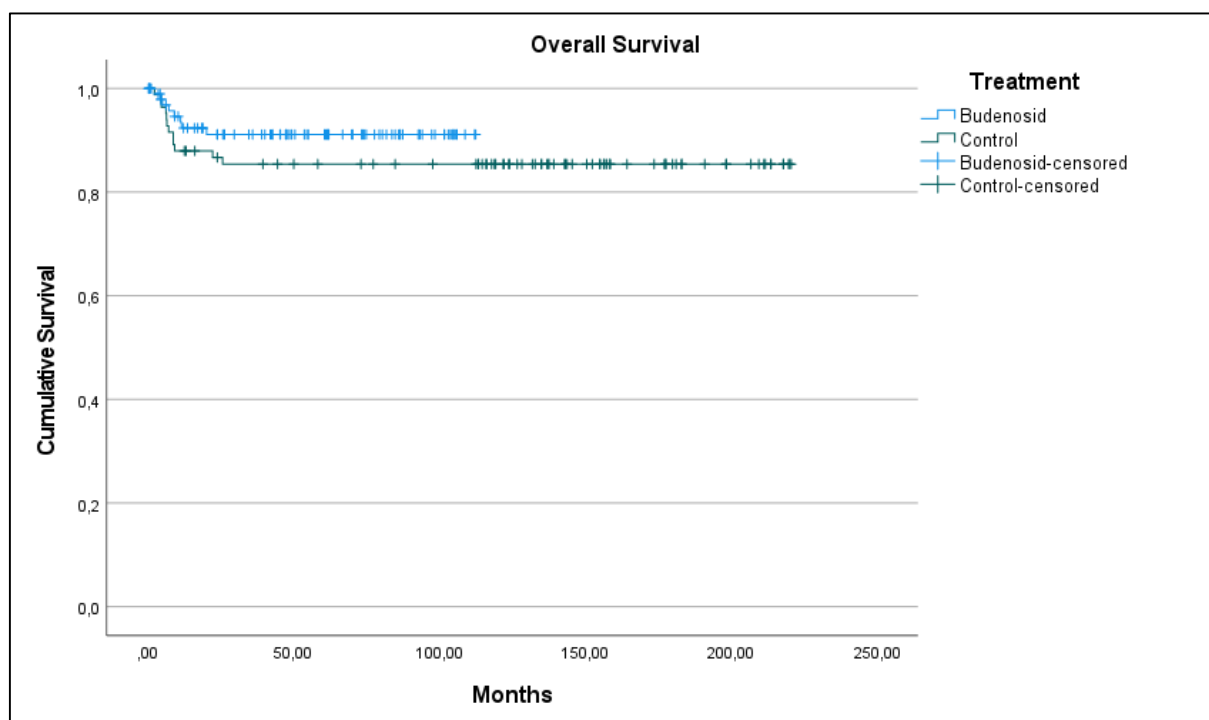

**Figure S1.** Kaplan-Meier curves: survival over all.
